# Supplementary material for: A concise enantioselective synthesis of the guaiane sesquiterpene (−)-oxyphyllol
Source: publisher site journal article supplement (doi:10.3762/bjoc.9.239), 2013-10-08

## **Supporting Information**

for

### **A concise enantioselective synthesis of the guaiane sesquiterpene (–)-oxyphyllol**

Martin Zahel and Peter Metz\*

Address: Fachrichtung Chemie und Lebensmittelchemie, Organische Chemie I,  
Technische Universität Dresden, Bergstrasse 66, 01069 Dresden, Germany

Email: Peter Metz - peter.metz@chemie.tu-dresden.de

\* Corresponding author

**<sup>1</sup>H NMR and <sup>13</sup>C NMR spectra**

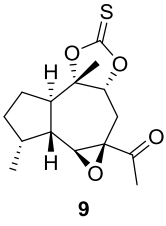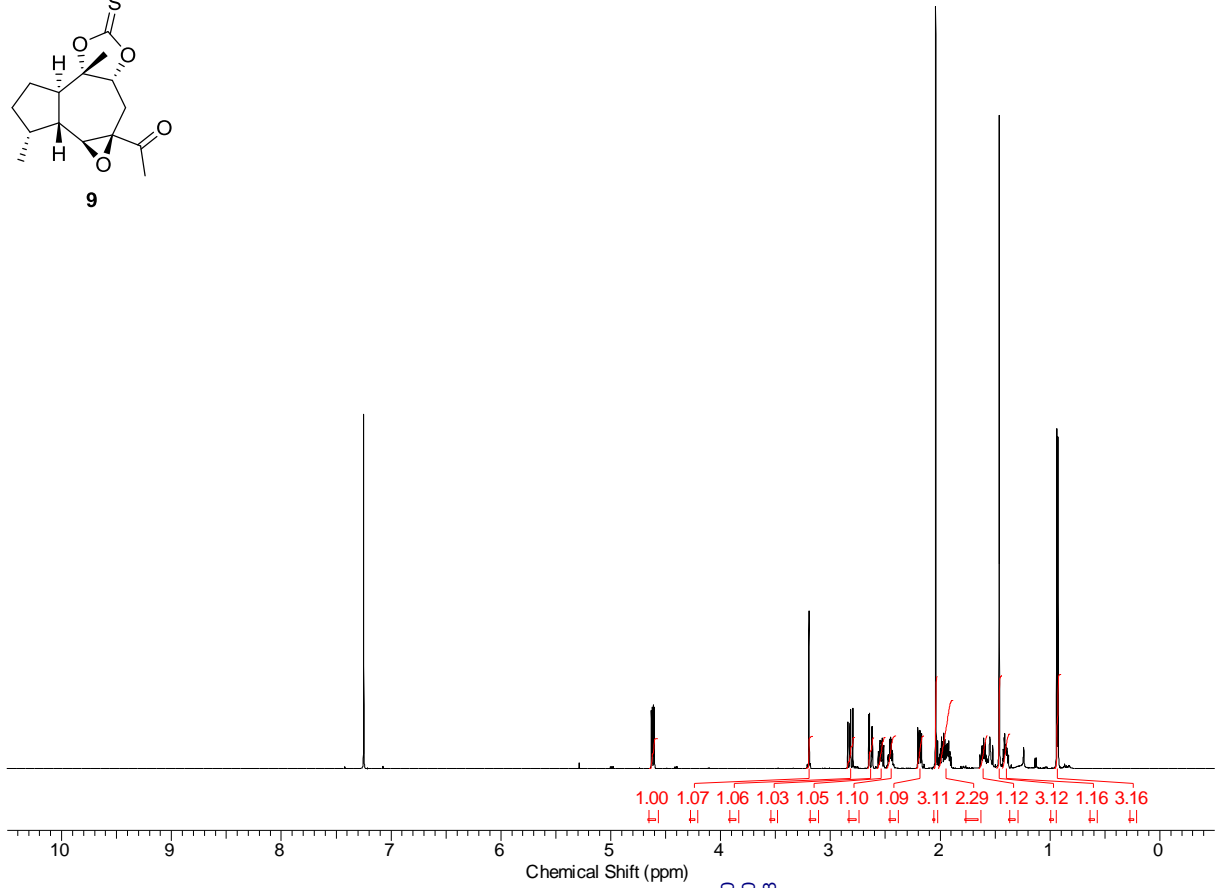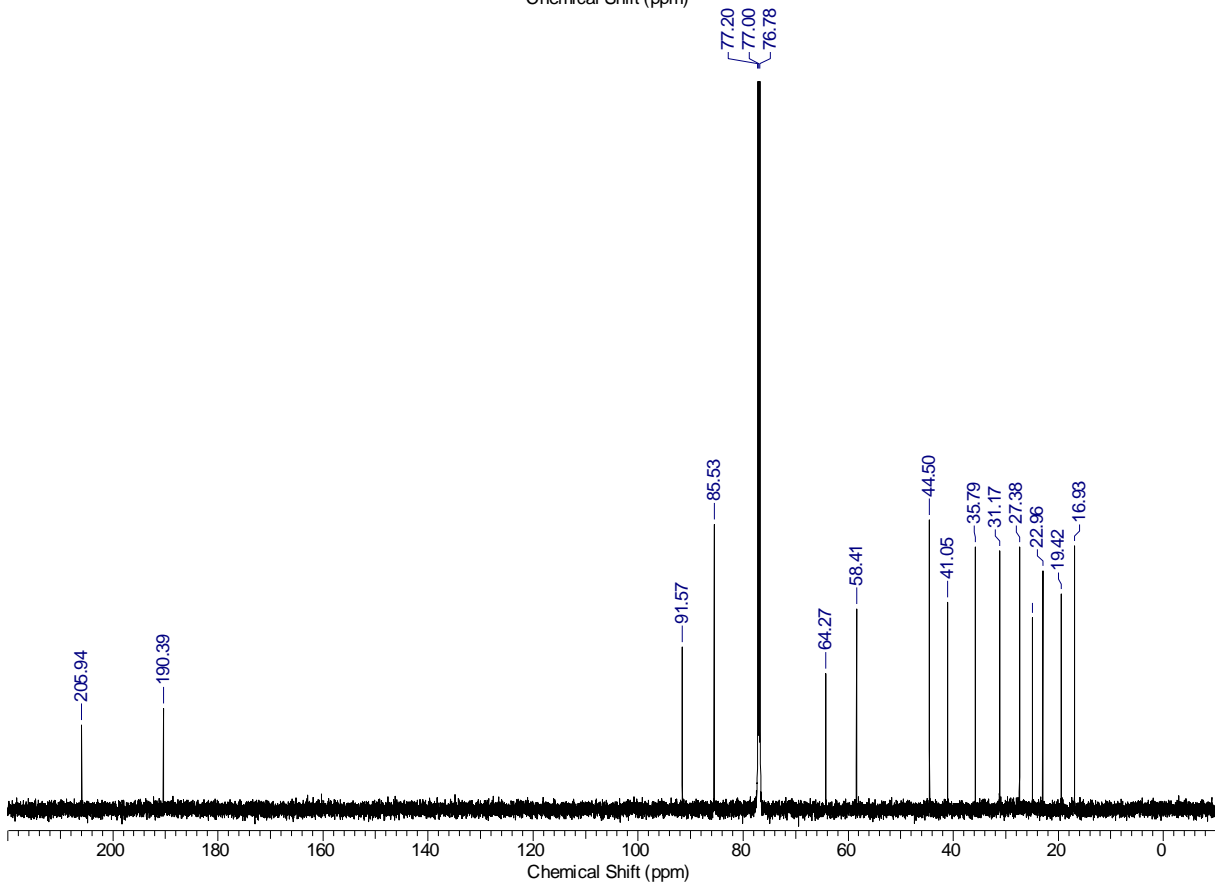

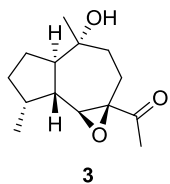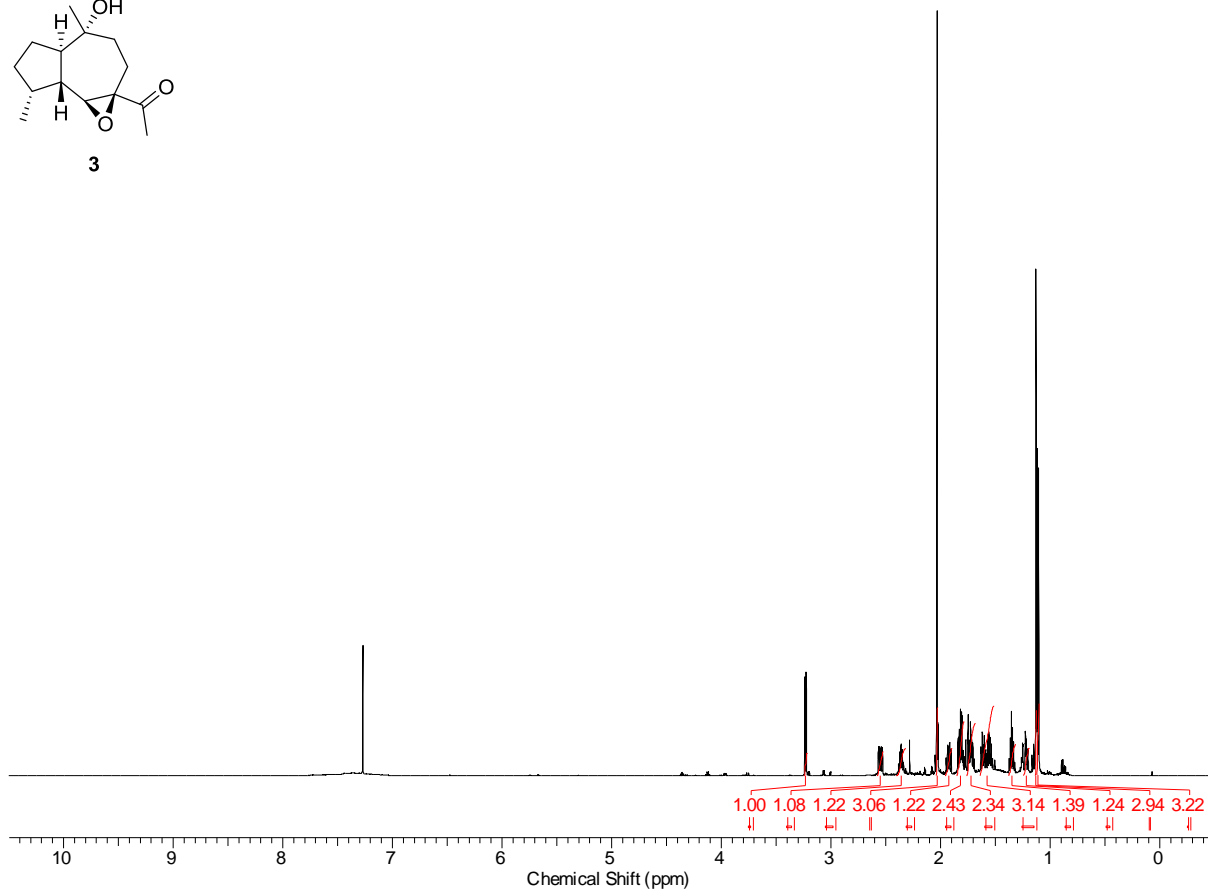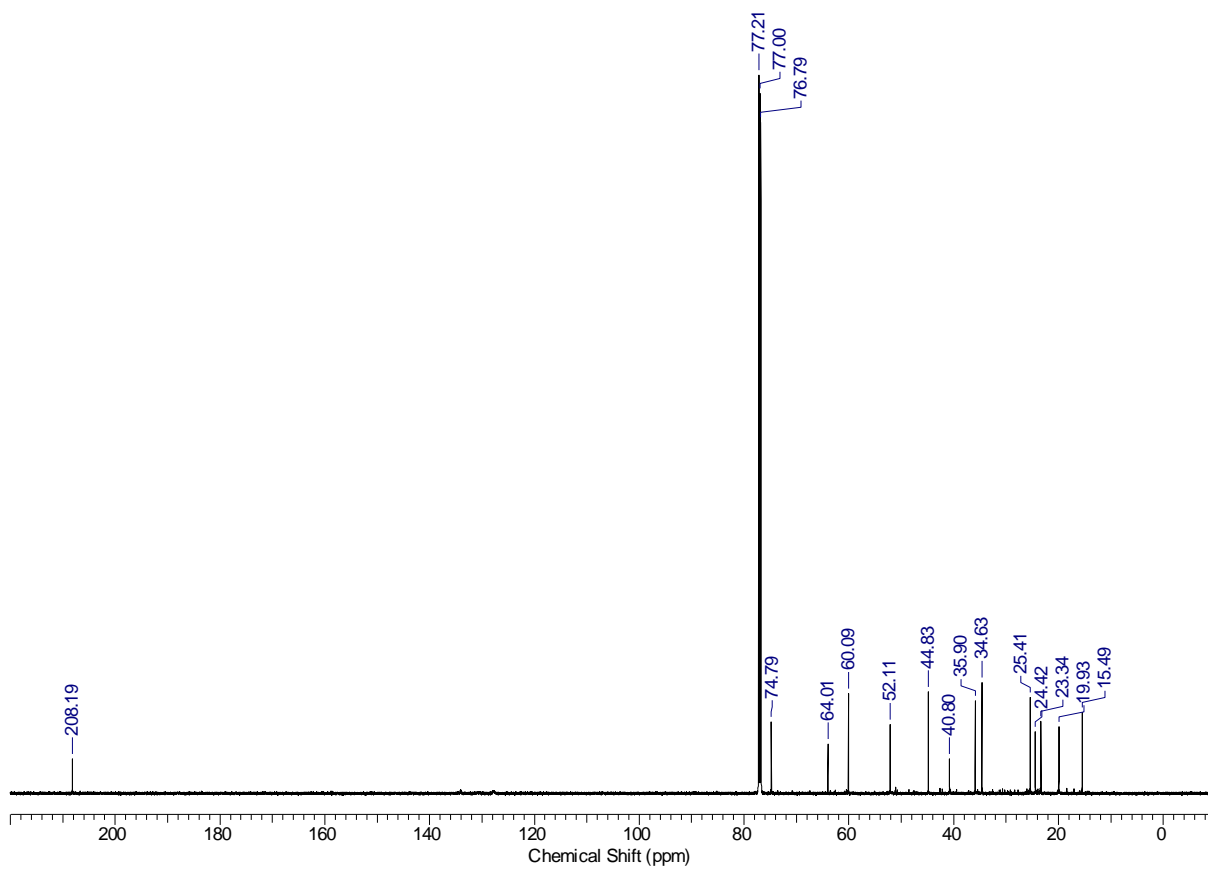

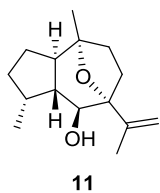

11

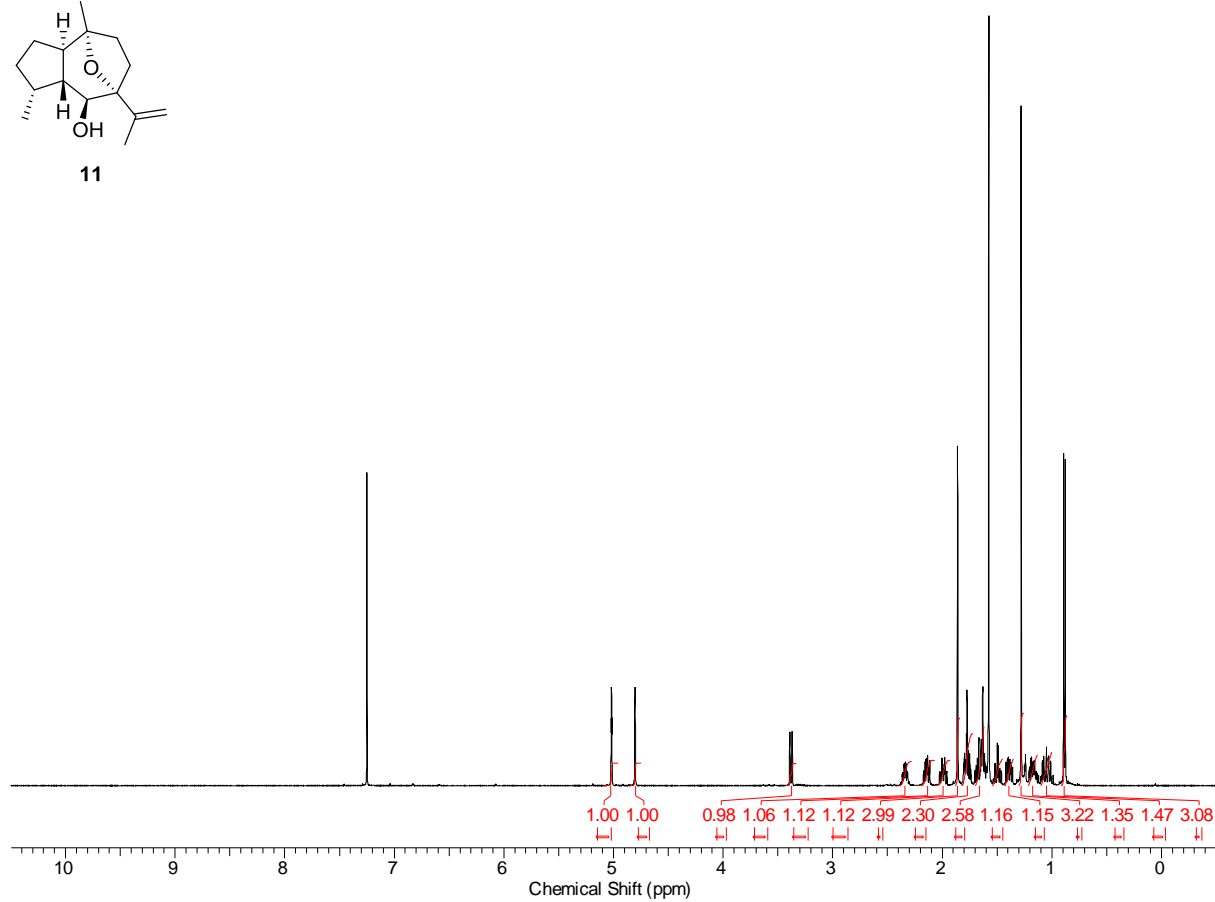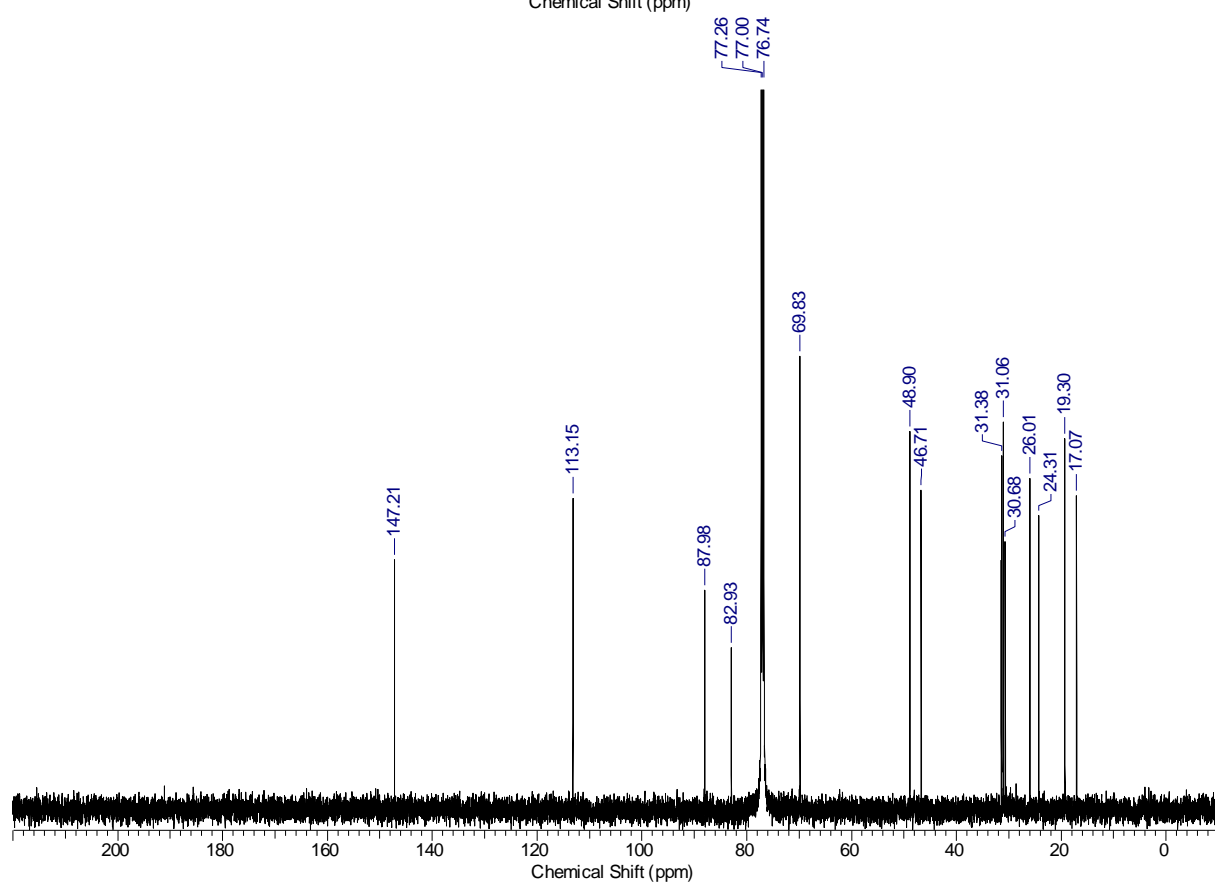

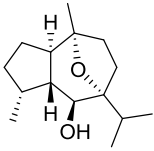

1

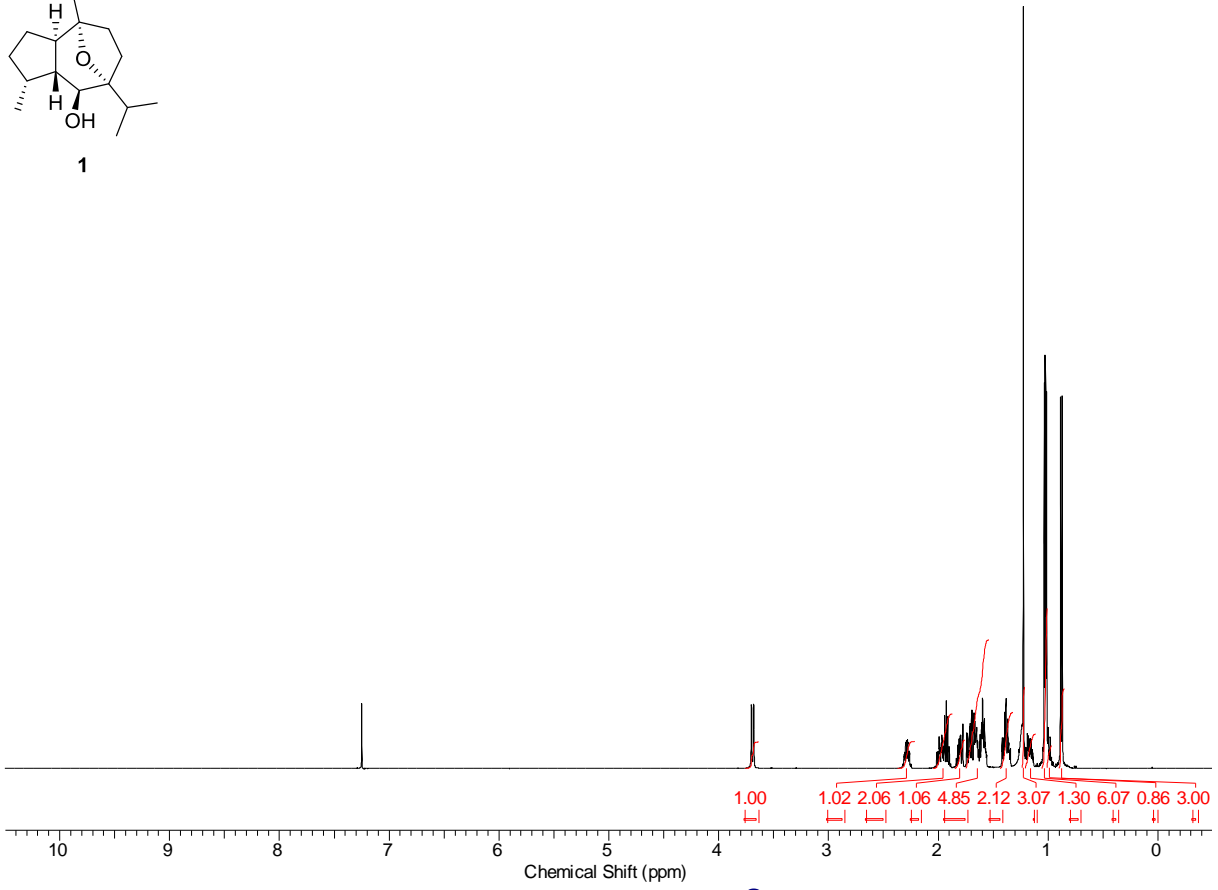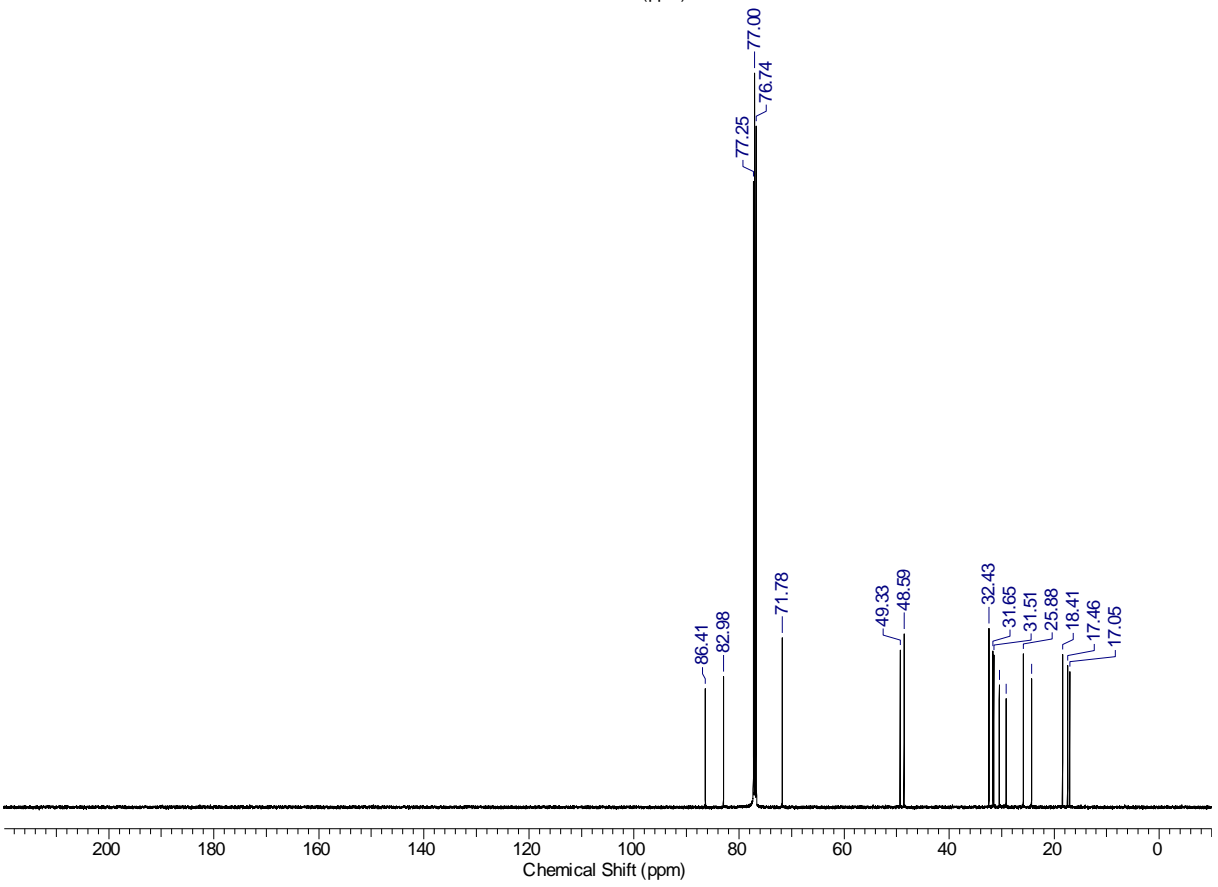

Supplement: Additional file 1 [file 1860-5397-9-239-S1.pdf]
